# Supplementary material
Source: PubMed Central journal article supplement (PMC4636329)
Supplement: NIHMS698523-supplement-Supplement.pdf [file NIHMS698523-supplement-Supplement.pdf]

## ONLINE SUPPLEMENT

### Relationships Between Selected Gene Polymorphisms and Blood Pressure Sensitivity to Weight Loss in Elderly Persons with Hypertension

William J. Kostis<sup>1</sup>, Javier Cabrera<sup>2,3</sup>, W. Craig Hooper<sup>4</sup>, Paul K. Whelton<sup>5</sup>,  
Mark A. Espeland<sup>6</sup>, Nora M. Cosgrove<sup>3</sup>, Jerry Q. Cheng<sup>3</sup>, Yingzi Deng<sup>3</sup>,  
Christine De Staerck<sup>4</sup>, Meredith Pyle<sup>4</sup>, Nisa Maruthur<sup>7,8</sup>, Ingrid Reyes<sup>2</sup>,  
Cheryl A. M. Anderson<sup>8</sup>, Jie Liu<sup>2</sup>, John B. Kostis<sup>3</sup>

Kostis: Polymorphisms associated with weight sensitivity of BP

#### Author Affiliations:

<sup>1</sup>Cardiology Division, Massachusetts General Hospital, Harvard Medical School, Boston, MA

<sup>2</sup>Department of Statistics, Rutgers University, Piscataway, NJ

<sup>3</sup>Cardiovascular Institute, UMDNJ-Robert Wood Johnson Medical School, New Brunswick, NJ

<sup>4</sup>Centers for Disease Control and Prevention, Atlanta, GA

<sup>5</sup>Tulane University School of Public Health and Tropical Medicine, New Orleans, LA

<sup>6</sup>Department of Biostatistical Sciences, Wake Forest School of Medicine, Winston-Salem, NC

<sup>7</sup>Division of General Internal Medicine, The Johns Hopkins University School of Medicine,  
Baltimore, MD

<sup>8</sup>Welch Center for Prevention, Epidemiology and Clinical Research, Johns Hopkins Medical  
Institutions, Baltimore, MD

Table S1. Clinical variable selection

| Variables in the model | Label                                      | glmnet Coefficient | Change in SBP predicted by BMI | Change in DBP predicted by BMI | Change in SBP or DBP predicted by BMI |
|------------------------|--------------------------------------------|--------------------|--------------------------------|--------------------------------|---------------------------------------|
| RV_DIABETES*           | Diabetes requiring insulin                 | 0.144172239        | X                              | X                              | X                                     |
| RV_LIGHT*              | Number of hours light activity per day     | -0.032537579       | X                              | X                              | X                                     |
| RV_BLOCKS*             | Number of blocks per day                   | -0.024896784       | X                              |                                | X                                     |
| RV_EXYEAR*             | Rate of activity in the past year          | 0.165451851        | X                              |                                | X                                     |
| RV_MOD*                | Number of hours moderate activity per day  | 0.057056787        | X                              |                                | X                                     |
| RV_DIAB_KIDX*          | Diabetes - Child                           | -5.829650858       | X                              |                                | X                                     |
| RV_KDNY_POPX*          | Kidney failure - Father                    | 1.020510836        | X                              |                                | X                                     |
| RV_SMOKECUR*           | Current smoker                             | 0.987904456        |                                | X                              | X                                     |
| RV_STRK*               | Have they ever had a stroke                | .                  |                                | X                              | X                                     |
| AGE                    | Age                                        | .                  |                                |                                |                                       |
| MALE1                  | Gender                                     | .                  |                                |                                |                                       |
| RV_RACE                | Race                                       | .                  |                                |                                |                                       |
| RVWGT                  | Weight at randomization                    | .                  |                                |                                |                                       |
| WT_CHNG                | Change in weight from randomization to F/U | 0.31206373         |                                |                                |                                       |
| RV_UNA                 | 24 hour urine sodium at randomization      | .                  |                                |                                |                                       |
| CHUNA                  | Change in urine sodium                     | .                  |                                |                                |                                       |
| F9_TOTCAL*             | Food total calcium at F/U visit 9          | .                  |                                |                                |                                       |
| RV_HBP_AGE*            | Age learned they had high blood pressure   | .                  |                                |                                |                                       |
| RV_MED_AGE*            | Age began taking BP meds                   | 0.001321736        |                                |                                |                                       |
| RV_HRTCOND*            | Have they ever had a heart attack          | .                  |                                |                                |                                       |
| RV_EXWEEK*             | Times exercise per week                    | .                  |                                |                                |                                       |
| RV_FLIGHTS*            | Number of flights per day                  | .                  |                                |                                |                                       |
| RV_VIG*                | Number of hours vigorous activity per day  | .                  |                                |                                |                                       |
| RV_SNOOZE*             | Number of hours of sleep per day           | .                  |                                |                                |                                       |
| RV_HBP_POPX*           | High blood pressure - Father               | .                  |                                |                                |                                       |
| RV_HBP_MOMX*           | High blood pressure - Mother               | .                  |                                |                                |                                       |
| RV_HBP_BROX*           | High blood pressure - Brother              | .                  |                                |                                |                                       |
| RV_HBP_SISX*           | High blood pressure - Sister               | .                  |                                |                                |                                       |
| RV_HBP_KIDX*           | High blood pressure - Child                | .                  |                                |                                |                                       |
| RV_DIAB_POPX*          | Diabetes - Father                          | .                  |                                |                                |                                       |
| RV_DIAB_MOMX*          | Diabetes - Mother                          | .                  |                                |                                |                                       |
| RV_DIAB_BROX*          | Diabetes - Brother                         | .                  |                                |                                |                                       |
| RV_DIAB_SISX*          | Diabetes - Sister                          | .                  |                                |                                |                                       |
| RV_KDNY_MOMX*          | Kidney failure - Mother                    | .                  |                                |                                |                                       |
| RV_KDNY_BROX           | Kidney failure - Brother                   | .                  |                                |                                |                                       |

\* Denotes those variables that were in the set of investigator-selected covariates (described on page 7)

Table S2. Changes in SBP, DBP, BMI, and 24-hour urine sodium between baseline and the first drug withdrawal visit in the seven data subsets

| Subset                                      | Patients |                             | Observations |        |       |      |        |         |         |
|---------------------------------------------|----------|-----------------------------|--------------|--------|-------|------|--------|---------|---------|
|                                             | N        | Variable                    | N            | Mean   | STD   | SE   | Median | Minimum | Maximum |
| Attention control<br>(subsets d & f)        | 243      | SBP_Change                  | 233          | -0.69  | 12.49 | 0.82 | 0      | -54     | 33      |
|                                             |          | DBP_Change                  | 233          | -0.58  | 7.68  | 0.50 | 0.00   | -24.00  | 21.00   |
|                                             |          | BMI_Change                  | 217          | -0.05  | 0.68  | 0.05 | 0.00   | -2.23   | 1.7     |
|                                             |          | 24-hour_urine_sodium_Change | 214          | -9.35  | 62.11 | 4.25 | -4.6   | -253.94 | 128.7   |
| Weight loss<br>(subset b)                   | 112      | SBP_Change                  | 110          | -3.3   | 13.44 | 1.28 | -4.5   | -30     | 46      |
|                                             |          | DBP_Change                  | 110          | -0.74  | 10.40 | 0.99 | -2.50  | -17.00  | 58.00   |
|                                             |          | BMI_Change                  | 106          | -1.55  | 1.03  | 0.10 | -1.44  | -5.01   | 0.78    |
|                                             |          | 24-hour_urine_sodium_Change | 102          | -6.72  | 62.83 | 6.22 | -4.32  | -186.95 | 132.58  |
| Sodium reduction<br>(subsets c & e)         | 255      | SBP_Change                  | 252          | -2.58  | 12.51 | 0.79 | -2     | -44     | 60      |
|                                             |          | DBP_Change                  | 252          | -1.53  | 8.30  | 0.52 | -1.00  | -25.00  | 24.00   |
|                                             |          | BMI_Change                  | 246          | -0.5   | 0.78  | 0.05 | -0.46  | -3.84   | 1.38    |
|                                             |          | 24-hour_urine_sodium_Change | 241          | -49.15 | 62.06 | 4.00 | -47.04 | -353.08 | 138.04  |
| Combined<br>intervention<br>(subset a)      | 112      | SBP_Change                  | 111          | -4.41  | 15.29 | 1.45 | -4     | -64     | 28      |
|                                             |          | DBP_Change                  | 111          | -2.84  | 9.84  | 0.93 | -2.00  | -31.00  | 22.00   |
|                                             |          | BMI_Change                  | 105          | -1.36  | 1.08  | 0.11 | -1.29  | -4.21   | 1.38    |
|                                             |          | 24-hour_urine_sodium_Change | 108          | -35.78 | 62.14 | 5.98 | -27.65 | -183.14 | 98.64   |
| All sodium reduction<br>(subsets a & c & e) | 367      | SBP_Change                  | 363          | -3.14  | 13.42 | 0.70 | -3     | -64     | 60      |
|                                             |          | DBP_Change                  | 363          | -1.93  | 8.80  | 0.46 | -2.00  | -31.00  | 24.00   |
|                                             |          | BMI_Change                  | 351          | -0.76  | 0.96  | 0.05 | -0.61  | -4.21   | 1.38    |
|                                             |          | 24-hour_urine_sodium_Change | 349          | -45.02 | 62.30 | 3.33 | -44.38 | -353.08 | 138.04  |
| All weight loss<br>(subsets a & b)          | 224      | SBP_Change                  | 221          | -3.86  | 14.38 | 0.97 | -4     | -64     | 46      |
|                                             |          | DBP_Change                  | 221          | -1.79  | 10.15 | 0.68 | -2.00  | -31.00  | 58.00   |
|                                             |          | BMI_Change                  | 211          | -1.45  | 1.06  | 0.07 | -1.37  | -5.01   | 1.38    |
|                                             |          | 24-hour_urine_sodium_Change | 210          | -21.67 | 64.01 | 4.42 | -17    | -186.95 | 132.58  |
| ALL                                         | 722      | SBP_Change                  | 706          | -2.36  | 13.16 | 0.50 | -2     | -64     | 60      |
|                                             |          | DBP_Change                  | 706          | -1.30  | 8.74  | 0.33 | -1.00  | -31.00  | 58.00   |
|                                             |          | BMI_Change                  | 674          | -0.65  | 1.02  | 0.04 | -0.5   | -5.01   | 1.7     |
|                                             |          | 24-hour_urine_sodium_Change | 665          | -27.66 | 64.85 | 2.51 | -25.3  | -353.08 | 138.04  |

Table S3. Associations of gene polymorphisms with the relationship of DBP change vs. BMI and 24-hour sodium change\*

| Group                     | Polymorphism | Na + Wt |        | Wt Only |        | Na Only |           | Polymorphism |        | Na + Wt + Investigator-Selected |        | Wt Only + Investigator-Selected |        | Na Only + Investigator-Selected |     |
|---------------------------|--------------|---------|--------|---------|--------|---------|-----------|--------------|--------|---------------------------------|--------|---------------------------------|--------|---------------------------------|-----|
|                           |              | One     | All    | One     | All    | One     | All       | One          | All    | One                             | All    | One                             | All    | One                             | All |
|                           |              |         |        |         |        |         |           |              |        |                                 |        |                                 |        |                                 |     |
| Group 1:<br>Control       | rs4646994    | 0.093   |        |         |        |         |           | rs2820037    | 0.017  | 0.021                           | 0.010  | 0.015                           | 0.018  | 0.021                           |     |
|                           | rs2820037    | 0.060   | 0.071  | 0.032   | 0.040  | 0.058   | 0.069     | rs7961152    | 0.082  | 0.080                           | 0.091  | 0.091                           | 0.080  | 0.084                           |     |
|                           | rs1799983    | 0.087   |        | 0.091   |        | 0.092   |           | rs1799983    | 0.061  |                                 | 0.051  |                                 | 0.067  |                                 |     |
|                           | rs6997709    | 0.070   | 0.027  |         |        | 0.068   | 0.028     | rs6997709    |        | 0.065                           |        |                                 | 0.067  | 0.071                           |     |
| Group 2:<br>Wt Only       | rs4646994    | 0.004   | 0.006  | 0.012   | 0.011  | 0.005   | 0.006     | rs4646994    | 0.007  | 0.010                           | 0.019  | 0.019                           | 0.008  | 0.010                           |     |
|                           | rs4961       | 0.023   |        | 0.028   |        | 0.027   |           | rs4961       | 0.032  |                                 | 0.035  | 0.097                           | 0.034  |                                 |     |
|                           | rs5370       |         | 0.039  | 0.091   | 0.019  |         | 0.041     | rs5186       | 0.099  | 0.012                           | 0.065  | 0.004                           | 0.050  | 0.012                           |     |
|                           | rs1982073    | 0.038   |        | 0.023   |        | 0.044   |           | rs1982073    | 0.046  |                                 | 0.028  |                                 | 0.050  |                                 |     |
|                           | rs2820037    | 0.004   | <0.001 | 0.002   | <0.001 | 0.005   | <0.001    | rs2820037    | 0.002  | 0.001                           | 0.001  | <0.001                          | 0.002  | 0.001                           |     |
|                           | rs1800896    |         | 0.056  | 0.092   | 0.019  |         | 0.058     | rs1800896    |        |                                 |        | 0.065                           |        | 0.004                           |     |
|                           | rs5744292    | <0.001  | 0.002  | <0.001  | 0.002  | <0.001  | 0.003     | rs5744292    | <0.001 | 0.005                           | <0.001 | 0.003                           | <0.001 | 0.004                           |     |
|                           | rs4684847    | 0.009   | 0.009  | 0.003   | 0.005  | 0.011   | 0.010     | rs4684847    | 0.018  | 0.042                           | 0.006  | 0.020                           | 0.019  | 0.040                           |     |
| rs1799983                 | 0.020        |         | 0.023  |         | 0.023  |         | rs1799983 | 0.019        |        | 0.023                           |        | 0.021                           |        |                                 |     |
| Group 3:<br>Na Only       | rs5443       | 0.053   | 0.046  | 0.048   | 0.047  | 0.053   | 0.047     | rs4961       | 0.073  | 0.045                           | 0.065  | 0.037                           | 0.072  | 0.047                           |     |
|                           | rs1982073    | 0.056   | 0.086  | 0.035   | 0.054  | 0.056   | 0.087     | rs5443       | 0.072  | 0.071                           | 0.064  | 0.075                           | 0.071  | 0.073                           |     |
|                           | rs7961152    |         | 0.063  |         | 0.056  |         | 0.064     | rs1982073    | 0.058  |                                 | 0.035  | 0.074                           | 0.058  |                                 |     |
|                           | rs1937506    | 0.092   |        | 0.082   |        | 0.092   |           | rs7961152    | 0.012  | 0.005                           | 0.011  | 0.004                           | 0.012  | 0.005                           |     |
| Group 4:<br>Both<br>Na+Wt | rs4646994    | 0.092   | 0.097  | 0.053   | 0.071  | 0.095   |           | rs1937506    | 0.070  | 0.070                           | 0.062  | 0.004                           | 0.070  |                                 |     |
|                           | rs2820037    | 0.026   | 0.051  | 0.033   | 0.071  | 0.023   | 0.055     | rs2820037    | 0.031  | 0.081                           | 0.035  | 0.076                           | 0.029  | 0.069                           |     |
|                           | rs5744292    | 0.008   | 0.002  | 0.010   | 0.007  | 0.011   | 0.003     | rs5744292    | 0.025  | 0.024                           | 0.029  | 0.068                           | 0.032  | 0.024                           |     |
|                           | rs11110912   | 0.086   |        | 0.039   | 0.093  | 0.067   |           | rs11110912   | 0.067  | 0.067                           | 0.026  | 0.067                           | 0.053  |                                 |     |
| rs1800629                 |              | 0.045   |        |         |        | 0.059   | rs1800872 | 0.076        |        | 0.082                           |        | 0.079                           |        |                                 |     |

|          |            |        |        |       |        |       |            |       |        |       |        |       |        |
|----------|------------|--------|--------|-------|--------|-------|------------|-------|--------|-------|--------|-------|--------|
| Group 5: | rs4646994  | 0.097  | 0.095  | 0.092 | 0.091  |       | rs4646994  | 0.074 | 0.077  | 0.080 | 0.083  | 0.095 | 0.099  |
| All Na   | rs5370     | 0.033  | 0.037  |       |        | 0.033 | rs5370     | 0.045 | 0.067  |       |        | 0.045 | 0.064  |
|          | rs5443     | 0.032  | 0.023  | 0.078 | 0.083  | 0.034 | rs1982073  | 0.056 |        | 0.034 | 0.049  | 0.069 |        |
|          | rs1982073  | 0.049  | 0.068  | 0.031 | 0.036  | 0.060 | rs1800896  | 0.086 | 0.059  | 0.045 | 0.025  | 0.077 | 0.055  |
|          | rs1800896  |        |        |       | 0.067  |       | rs7961152  | 0.034 | 0.021  | 0.015 | 0.006  | 0.041 | 0.026  |
|          | rs5744292  | 0.005  | 0.004  | 0.006 | 0.010  | 0.006 | rs5744292  | 0.013 | 0.023  | 0.014 | 0.040  | 0.015 | 0.027  |
|          | rs1937506  | 0.078  | 0.079  | 0.098 | 0.095  |       | rs11110912 |       |        |       | 0.083  |       |        |
|          | rs11110912 | 0.094  | 0.067  | 0.062 | 0.025  | 0.085 |            |       |        |       |        |       |        |
| Group 6: | rs4646994  | 0.080  | 0.080  |       |        |       | rs4646994  | 0.052 | 0.053  |       |        |       |        |
| All Wt   | rs5186     | 0.079  |        | 0.077 |        | 0.077 | rs5186     | 0.030 | 0.047  | 0.025 | 0.037  | 0.031 | 0.041  |
|          | rs1982073  | 0.059  | 0.039  | 0.049 | 0.043  | 0.079 | rs1982073  | 0.070 | 0.079  | 0.054 | 0.069  | 0.095 | 0.097  |
|          | rs2820037  | 0.005  | <0.001 | 0.002 | <0.001 | 0.006 | rs2820037  | 0.003 | <0.001 | 0.001 | <0.001 | 0.004 | <0.001 |
|          | rs5744292  | <0.001 | 0.003  | 0.001 | 0.005  | 0.001 | rs5744292  | 0.001 | 0.019  | 0.003 | 0.031  | 0.002 | 0.021  |
|          | rs4684847  | 0.098  |        | 0.057 |        |       | rs4684847  | 0.090 |        | 0.050 | 0.076  |       |        |
|          | rs11110912 | 0.027  | 0.020  | 0.004 | 0.006  | 0.022 | rs11110912 | 0.018 | 0.013  | 0.002 | 0.003  | 0.015 | 0.007  |
| Group 7: | rs4646994  | 0.053  | 0.056  | 0.051 | 0.051  | 0.073 | rs4961     | 0.011 | 0.007  | 0.009 | 0.006  | 0.012 | 0.008  |
| All      | rs4961     |        |        |       | 0.089  |       | rs1982073  | 0.018 | 0.019  | 0.010 | 0.010  | 0.026 | 0.027  |
|          | rs5443     | 0.066  | 0.052  |       |        | 0.071 | rs1800896  | 0.053 | 0.035  | 0.029 | 0.016  | 0.048 | 0.033  |
|          | rs1982073  | 0.038  | 0.040  | 0.028 | 0.027  | 0.050 | rs5744292  | 0.071 | 0.086  |       |        | 0.071 | 0.086  |
|          | rs1800896  |        | 0.067  | 0.052 | 0.028  | 0.097 | rs1937506  |       |        | 0.089 |        | 0.071 | 0.086  |
|          | rs5744292  | 0.081  | 0.062  |       |        | 0.083 | rs11110912 |       | 0.085  |       | 0.029  |       | 0.074  |
|          | rs1937506  |        |        | 0.092 | 0.085  |       |            |       |        |       |        |       |        |
|          | rs11110912 |        |        |       | 0.034  | 0.090 |            |       |        |       |        |       |        |

\* Changes between baseline and first drug withdrawal visit for DBP and BMI and between baseline and 9-month visit for 24-hour sodium.

The table includes polymorphisms that were associated ( $p < 0.1$ ) with weight and salt sensitivity using linear statistics as described in detail on page 6.

### **Example Calculations for Tables S4 and S5**

Tables S4 and S5 depict the estimation of the number of truly significant observed associations (true discoveries) as the number of observed significant associations minus the number of false discoveries expected to occur at a given P value based on our simulation data. Tables S4 and S5 show the 50th and 80th percentiles of counts of false discoveries generated from 100 simulations of the random data set for SBP (Table S4) and 100 simulations for DBP (Table S5) (see pages 11-12 of the manuscript for further details). As an example, in Table S4, Group 2 (Wt Only), the difference between the expected discoveries (at the 50th percentile, with  $\alpha=0.1$ ) and the observed discoveries ranges between 1 and 3.5. This suggests that the number of true discoveries would be 2 or 3. In Table 2, we ranked the observed six polymorphisms with significant association to SBP change according to the P values of the association and chose the 3 polymorphisms with the lowest p-values. Those were included in the third column of Table 3. Similar estimations were performed for DBP change as shown in Tables S5, S3, and 3, respectively.

Table S4. False and observed discoveries of polymorphisms that intervene in the relationship of SBP change with BMI change

| Group                      | Expected Number of False Discoveries | Number of Observed Statistically Significant Discoveries |     |               |     |               |     |     |     |     |     |     |     |
|----------------------------|--------------------------------------|----------------------------------------------------------|-----|---------------|-----|---------------|-----|-----|-----|-----|-----|-----|-----|
|                            |                                      | $\alpha=0.1$                                             |     | $\alpha=0.05$ |     | $\alpha=0.01$ |     | 80% |     | 80% |     | obs |     |
|                            |                                      | 50%                                                      | 80% | 50%           | 80% | 50%           | 80% | obs | 50% | 80% | obs | 80% | obs |
| <b>Group 1: Control</b>    |                                      |                                                          |     |               |     |               |     |     |     |     |     |     |     |
|                            | 6                                    | 1                                                        | 2   | 0             | 1   | 0             | 1   | 1   | 0   | 0   | 0   | 0   | 0   |
|                            | 5                                    | 1                                                        | 2.2 | 1             | 1.2 | 1             | 1   | 1   | 0   | 0   | 0   | 0   | 0   |
|                            | 4                                    | 2                                                        | 3   | 1             | 2   | 1             | 2   | 2   | 0   | 0   | 1   | 0   | 1   |
|                            | 3                                    | 2                                                        | 3.2 | 1             | 2   | 1             | 2   | 2   | 0   | 1   | 1   | 1   | 1   |
|                            | 2                                    | 3                                                        | 4   | 1             | 3   | 1             | 3   | 2   | 0   | 1   | 1   | 1   | 1   |
|                            | 1                                    | 3                                                        | 5   | 1             | 3   | 1             | 3   | 3   | 0   | 1   | 1   | 1   | 1   |
| <b>Group 2: Wt Only</b>    |                                      |                                                          |     |               |     |               |     |     |     |     |     |     |     |
|                            | 6                                    | 1                                                        | 2   | 0             | 1   | 0             | 1   | 2   | 0   | 0   | 0   | 0   | 0   |
|                            | 5                                    | 1                                                        | 2   | 1             | 1   | 1             | 1   | 2   | 0   | 0   | 0   | 0   | 0   |
|                            | 4                                    | 2                                                        | 2   | 1             | 1   | 1             | 1   | 2   | 0   | 1   | 0   | 1   | 0   |
|                            | 3                                    | 2.5                                                      | 4   | 1             | 2   | 1             | 2   | 2   | 0   | 1   | 1   | 1   | 1   |
|                            | 2                                    | 3                                                        | 5   | 1             | 3   | 1             | 3   | 2   | 0   | 1   | 2   | 1   | 2   |
|                            | 1                                    | 4                                                        | 5   | 2             | 3   | 2             | 3   | 3   | 0   | 1   | 2   | 1   | 2   |
| <b>Group 3: Na Only</b>    |                                      |                                                          |     |               |     |               |     |     |     |     |     |     |     |
|                            | 6                                    | 1                                                        | 3   | 0             | 1   | 0             | 1   | 1   | 0   | 0   | 0   | 0   | 0   |
|                            | 5                                    | 1                                                        | 3   | 0             | 1   | 0             | 1   | 1   | 0   | 0   | 1   | 0   | 1   |
|                            | 4                                    | 2                                                        | 3   | 1             | 2   | 1             | 2   | 1   | 0   | 0   | 1   | 0   | 1   |
|                            | 3                                    | 2                                                        | 4   | 1             | 2   | 1             | 2   | 2   | 0   | 1   | 1   | 1   | 1   |
|                            | 2                                    | 2                                                        | 4   | 1             | 2.2 | 1             | 2.2 | 3   | 0   | 1   | 1   | 1   | 1   |
|                            | 1                                    | 3                                                        | 4   | 1             | 3   | 1             | 3   | 4   | 0   | 1   | 1   | 1   | 1   |
| <b>Group 4: Both Na+Wt</b> |                                      |                                                          |     |               |     |               |     |     |     |     |     |     |     |
|                            | 6                                    | 1                                                        | 2   | 0             | 1   | 0             | 1   | 2   | 0   | 0   | 0   | 0   | 0   |
|                            | 5                                    | 1                                                        | 2   | 0             | 1   | 0             | 1   | 2   | 0   | 0   | 0   | 0   | 0   |
|                            | 4                                    | 1                                                        | 2   | 0             | 1   | 0             | 1   | 2   | 0   | 0   | 0   | 0   | 0   |
|                            | 3                                    | 2                                                        | 4   | 1             | 2   | 1             | 2   | 2   | 0   | 1   | 1   | 1   | 1   |
|                            | 2                                    | 3                                                        | 5   | 1             | 3   | 1             | 3   | 2   | 0   | 1   | 1   | 1   | 1   |
|                            | 1                                    | 4                                                        | 5   | 2             | 3   | 2             | 3   | 2   | 0   | 1   | 1   | 1   | 1   |
| <b>Group 5: All Na</b>     |                                      |                                                          |     |               |     |               |     |     |     |     |     |     |     |
|                            | 6                                    | 1.5                                                      | 2   | 0             | 1   | 0             | 1   | 2   | 0   | 0   | 1   | 0   | 1   |
|                            | 5                                    | 2                                                        | 3   | 1             | 1   | 1             | 1   | 3   | 0   | 0   | 1   | 0   | 1   |
|                            | 4                                    | 2                                                        | 3   | 1             | 2   | 1             | 2   | 4   | 0   | 0   | 1   | 0   | 1   |
|                            | 3                                    | 2                                                        | 3   | 1             | 2   | 1             | 2   | 5   | 0   | 1   | 2   | 1   | 2   |
|                            | 2                                    | 3                                                        | 4   | 1             | 2.2 | 1             | 2.2 | 5   | 0   | 1   | 2   | 1   | 2   |
|                            | 1                                    | 3                                                        | 4   | 2             | 3   | 2             | 3   | 7   | 0   | 1   | 2   | 1   | 2   |

|                 |   |     |   |   |   |   |   |   |   |   |
|-----------------|---|-----|---|---|---|---|---|---|---|---|
| Group 6: All Wt | 6 | 1   | 2 | 2 | 0 | 1 | 2 | 0 | 0 | 1 |
|                 | 5 | 1   | 3 | 2 | 1 | 2 | 2 | 0 | 0 | 1 |
|                 | 4 | 2   | 3 | 3 | 1 | 2 | 2 | 0 | 0 | 1 |
|                 | 3 | 2.5 | 4 | 5 | 1 | 2 | 2 | 0 | 1 | 1 |
|                 | 2 | 3   | 5 | 5 | 2 | 3 | 2 | 0 | 1 | 1 |
|                 | 1 | 4   | 5 | 5 | 2 | 3 | 5 | 0 | 1 | 1 |
| Group 7: All    | 6 | 1   | 2 | 5 | 0 | 1 | 2 | 0 | 0 | 0 |
|                 | 5 | 1   | 3 | 5 | 1 | 1 | 3 | 0 | 0 | 0 |
|                 | 4 | 2   | 3 | 5 | 1 | 2 | 3 | 0 | 0 | 0 |
|                 | 3 | 2   | 3 | 5 | 1 | 2 | 3 | 0 | 1 | 0 |
|                 | 2 | 2   | 4 | 7 | 1 | 2 | 6 | 0 | 1 | 0 |
|                 | 1 | 3   | 4 | 8 | 2 | 3 | 7 | 0 | 1 | 0 |

50%=Median Number of False Discoveries, 80%=80th% of False Discoveries, obs=Number of actual discoveries from the data

\* Changes between baseline and first drug withdrawal visit for SBP and BMI and between baseline and 9-month visit for 24-hour sodium



Table S5. False and observed discoveries of polymorphisms that intervene in the relationship of DBP change with BMI change

| Group               | Expected Number of False Discoveries | Number of Observed Statistically Significant Discoveries |     |               |     |               |     |     |     |     |     |     |     |
|---------------------|--------------------------------------|----------------------------------------------------------|-----|---------------|-----|---------------|-----|-----|-----|-----|-----|-----|-----|
|                     |                                      | $\alpha=0.1$                                             |     | $\alpha=0.05$ |     | $\alpha=0.01$ |     | 80% |     | 50% |     | 80% |     |
|                     |                                      | 50%                                                      | 80% | obs           | 50% | 80%           | obs | 50% | 80% | obs | 50% | 80% | obs |
| Group 1: Control    | 6                                    | 1                                                        | 2   | 1             | 0   | 1             | 0   | 0   | 1   | 0   | 0   | 0   | 0   |
|                     | 5                                    | 1                                                        | 2   | 1             | 1   | 1             | 0   | 0   | 1   | 0   | 0   | 0   | 0   |
|                     | 4                                    | 2                                                        | 3   | 1             | 1   | 2             | 1   | 0   | 2   | 1   | 0   | 1   | 0   |
|                     | 3                                    | 2                                                        | 4   | 3             | 1   | 2             | 1   | 0   | 2   | 1   | 0   | 1   | 0   |
| Group 2: Wt Only    | 2                                    | 3                                                        | 5   | 4             | 2   | 3             | 1   | 0   | 3   | 1   | 0   | 1   | 0   |
|                     | 1                                    | 4                                                        | 6   | 4             | 2   | 3             | 2   | 1   | 3   | 2   | 1   | 1   | 0   |
|                     | 6                                    | 2                                                        | 3   | 1             | 1   | 2             | 1   | 0   | 2   | 1   | 0   | 0   | 0   |
|                     | 5                                    | 2                                                        | 4   | 2             | 1   | 2             | 2   | 0   | 2   | 2   | 0   | 1   | 0   |
| Group 3: Na Only    | 4                                    | 3                                                        | 4   | 3             | 2   | 2             | 2   | 0   | 2   | 2   | 0   | 1   | 0   |
|                     | 3                                    | 4                                                        | 6   | 5             | 2   | 4             | 3   | 1   | 4   | 3   | 0   | 1   | 1   |
|                     | 2                                    | 5                                                        | 7   | 6             | 3   | 5             | 3   | 1   | 5   | 3   | 1   | 2   | 1   |
|                     | 1                                    | 7                                                        | 9   | 6             | 4   | 6             | 4   | 1   | 6   | 4   | 1   | 2   | 2   |
| Group 4: Both Na+Wt | 6                                    | 1                                                        | 3   | 1             | 1   | 2             | 0   | 0   | 2   | 0   | 0   | 0   | 0   |
|                     | 5                                    | 2                                                        | 3   | 2             | 1   | 2             | 0   | 0   | 2   | 0   | 0   | 0.2 | 0   |
|                     | 4                                    | 2                                                        | 3   | 3             | 1   | 2             | 0   | 0   | 2   | 0   | 0   | 1   | 0   |
|                     | 3                                    | 3                                                        | 5   | 4             | 2   | 3             | 1   | 0   | 3   | 1   | 0   | 1   | 0   |
| Group 5: All Na     | 2                                    | 4                                                        | 5   | 5             | 2   | 3             | 2   | 0   | 3   | 2   | 0   | 1   | 0   |
|                     | 1                                    | 5                                                        | 6   | 5             | 3   | 4             | 3   | 1   | 4   | 2   | 1   | 2   | 1   |
|                     | 6                                    | 1                                                        | 2   | 2             | 1   | 1             | 1   | 0   | 1   | 1   | 0   | 0   | 0   |
|                     | 5                                    | 2                                                        | 3   | 2             | 1   | 2             | 1   | 0   | 2   | 1   | 0   | 0   | 0   |
| Group 5: All Na     | 4                                    | 3                                                        | 5   | 6             | 1   | 3             | 1   | 0   | 3   | 1   | 0   | 1   | 0   |
|                     | 3                                    | 4                                                        | 5   | 7             | 2   | 3.2           | 2   | 1   | 4   | 2   | 1   | 1   | 1   |
|                     | 2                                    | 5                                                        | 6   | 9             | 3   | 4             | 5   | 1   | 4   | 5   | 1   | 2   | 1   |
|                     | 1                                    | 5.5                                                      | 7   | 9             | 3   | 5             | 6   | 1   | 5   | 6   | 1   | 2   | 1   |

|                 |   |     |     |   |     |     |   |   |     |   |
|-----------------|---|-----|-----|---|-----|-----|---|---|-----|---|
| Group 6: All Wt | 6 | 2   | 3   | 3 | 1   | 2   | 3 | 0 | 1   | 1 |
|                 | 5 | 3   | 4   | 3 | 1.5 | 3   | 3 | 0 | 1   | 1 |
|                 | 4 | 4   | 5   | 3 | 2   | 3   | 3 | 0 | 1   | 1 |
|                 | 3 | 4   | 6   | 4 | 3   | 4   | 3 | 1 | 1   | 1 |
|                 | 2 | 5   | 7.2 | 5 | 3   | 5   | 3 | 1 | 2   | 1 |
|                 | 1 | 7   | 9   | 6 | 4.5 | 6.2 | 4 | 2 | 3   | 2 |
| Group 7: All    | 6 | 1.5 | 3   | 0 | 0   | 1.2 | 0 | 0 | 0   | 0 |
|                 | 5 | 2   | 3   | 1 | 1   | 2   | 0 | 0 | 0.2 | 0 |
|                 | 4 | 2   | 4   | 1 | 1   | 3   | 0 | 0 | 1   | 0 |
|                 | 3 | 3   | 5   | 3 | 2   | 3   | 0 | 0 | 1   | 0 |
|                 | 2 | 4   | 6   | 6 | 2   | 4   | 2 | 0 | 1   | 0 |
|                 | 1 | 5   | 7   | 8 | 3   | 5   | 3 | 0 | 2   | 1 |

50%=Median Number of False Discoveries, 80%=80th% of False Discoveries, obs=Number of actual discoveries from the data

\* Changes between baseline and first drug withdrawal visit for DBP and BMI and between baseline and 9-month visit for 24-hour sodium



Table S7. Results of the recursive partitioning model for SBP and DBP

| SBP    |              |            |              |             |                                                                           |
|--------|--------------|------------|--------------|-------------|---------------------------------------------------------------------------|
| Subset | Slope        | Group size | T            | P value     | Polymorphisms                                                             |
| 1      | -2.94651014  | 46         | -2.338325835 | 0.009685176 | rs5370#2 & rs699#2 & rs1982073#2                                          |
| 1      | -14.41029055 | 13         | -2.34445042  | 0.009527572 | rs5370#2 & rs699#2 & rs1982073#2 & rs5443=1                               |
| 1      | 7.667375757  | 19         | 1.471228419  | 0.070614677 | rs5370=2 & rs1800896#2 & rs7961152=1                                      |
| 2      | 5.547568816  | 50         | 2.266161648  | 0.011720744 | rs4646994#1 & rs1800629=1                                                 |
| 2      | 6.016794643  | 41         | 2.473142892  | 0.006696529 | rs4646994#1 & rs1800629=1 & rs1982073#1                                   |
| 2      | 6.506129447  | 31         | 1.73851433   | 0.041060114 | rs4646994#1 & rs1800629=1 & rs1982073#1 & rs1800896#1                     |
| 3      | -0.13439452  | 57         | -3.198217793 | 0.000691399 | rs1800896=2 & rs1799983#1                                                 |
| 3      | 0.041535486  | 77         | 2.684618183  | 0.003630635 | rs1800896#2 & rs1982073#3                                                 |
| 3      | 0.05390639   | 29         | 2.373680826  | 0.008805884 | rs1800896#2 & rs1982073=2 & rs1799983=1                                   |
| 4      | 11.38697663  | 9          | 1.147339669  | 0.125620633 | rs6997709#2 & rs1937506=1 & rs1982073=1                                   |
| 4      | 1.341591295  | 29         | -0.308635249 | 0.378799502 | rs6997709#2 & rs1937506#1                                                 |
| 5      | -0.090565882 | 82         | -3.38517753  | 0.000355661 | rs1937506#1 & rs4646994#2                                                 |
| 5      | 0.141832875  | 35         | 2.694693959  | 0.003522665 | rs1937506#1 & rs4646994=2 & rs7961152=2                                   |
| 5      | -0.10229772  | 48         | -3.022753044 | 0.001252433 | rs1937506=1 & rs1800629=2                                                 |
| 6      | 6.860829769  | 33         | 2.141618685  | 0.016112089 | rs699#1 & rs4961=2                                                        |
| 6      | 0.698090431  | 49         | -1.3147861   | 0.0942909   | rs699#1 & rs4961#2 & rs1937506#1                                          |
| 7      | 5.626374158  | 42         | 2.581514081  | 0.004918399 | rs1800872=2 & rs5186=1 & rs1800796=1 & rs7961152#1 & rs699#1              |
| 7      | -0.904445516 | 44         | -1.791633824 | 0.036595821 | rs6997709#1 & rs187238#1 & rs5186#1 & rs1800796=1 & rs7961152#1 & rs699#1 |
| DBP    |              |            |              |             |                                                                           |
| Subset | Slope        | Group size | T            | P value     | Polymorphisms                                                             |
| 1      | -1.88455052  | 40         | -2.77716966  | 0.002741727 | rs5370#2 & rs4646994#1 & rs1982073#2 & rs699#1                            |
| 1      | 7.109257428  | 20         | 2.056431449  | 0.019870474 | rs699=1 & rs1982073=2 & rs7961152#2                                       |
| 2      | -0.568763615 | 20         | -2.47064874  | 0.006743411 | rs5443=1 & rs1982073#1 & rs1800795#2                                      |
| 2      | 3.866313665  | 44         | 1.629377609  | 0.051616553 | rs1800795=2                                                               |
| 3      | 0.042142575  | 47         | 2.495508904  | 0.00628883  | rs1800896#2 & rs1982073#3 & rs5186=2                                      |
| 3      | -0.043398761 | 130        | -3.188426683 | 0.000715246 | rs1800896=2                                                               |
| 3      | -0.053282823 | 69         | -2.613497038 | 0.004481043 | rs1800896=2 & rs1982073#2                                                 |
| 3      | -0.133780601 | 18         | -3.099135341 | 0.000970432 | rs1800896=2 & rs1982073#2 & rs7961152=1                                   |
| 4      | 5.150537534  | 14         | 2.416763396  | 0.007829596 | rs1937506=1 & rs1982073=1                                                 |
| 4      | -1.375319427 | 52         | -3.424850556 | 0.000307569 | rs1937506=1 & rs1982073#1                                                 |
| 4      | -2.841602813 | 27         | -3.508116081 | 0.000225646 | rs1937506=1 & rs1982073#1 & rs5186=2                                      |
| 5      | 0.044072794  | 70         | 3.426886035  | 0.000305273 | rs1800896#3 & rs5443#3 & rs1800872#2 & rs1800795#2                        |
| 5      | -0.03596774  | 53         | -1.995808429 | 0.022977389 | rs1800896#3 & rs5443#3 & rs1800872#2 & rs1800795=2                        |
| 5      | -0.04712368  | 57         | -2.691681112 | 0.003554644 | rs1800896#3 & rs5443=3                                                    |
| 6      | 3.303274366  | 73         | 1.872977184  | 0.030535768 | rs4961#2 & rs5443#3 & rs1982073#2                                         |

|   |              |     |              |             |                                                               |
|---|--------------|-----|--------------|-------------|---------------------------------------------------------------|
| 7 | 3.125770798  | 199 | 3.197938477  | 0.000692069 | rs11110912=1 & rs4646994#2 & rs699#3                          |
| 7 | 4.163061022  | 77  | 2.78698206   | 0.002660071 | rs11110912=1 & rs4646994#2 & rs699#3 & rs5443#1 & rs1982073#2 |
| 7 | 0.015813674  | 270 | -3.663384585 | 0.000124452 | rs11110912=1 & rs4646994=2                                    |
| 7 | -1.233170397 | 67  | -2.919642028 | 0.001752168 | rs11110912=1 & rs4646994=2 & rs1982073#3 & rs1937506#1        |
| 7 | -0.221304402 | 105 | -2.529442835 | 0.005712189 | rs11110912=1 & rs4646994=2 & rs1982073=3                      |

---

## Figure Legends

Figure S1. Box plots of weight sensitivity and salt sensitivity associated with selected polymorphisms.

Figure S2. Diagram of a recursive partition tree with polymorphisms as the partitioning variables in the weight loss group.

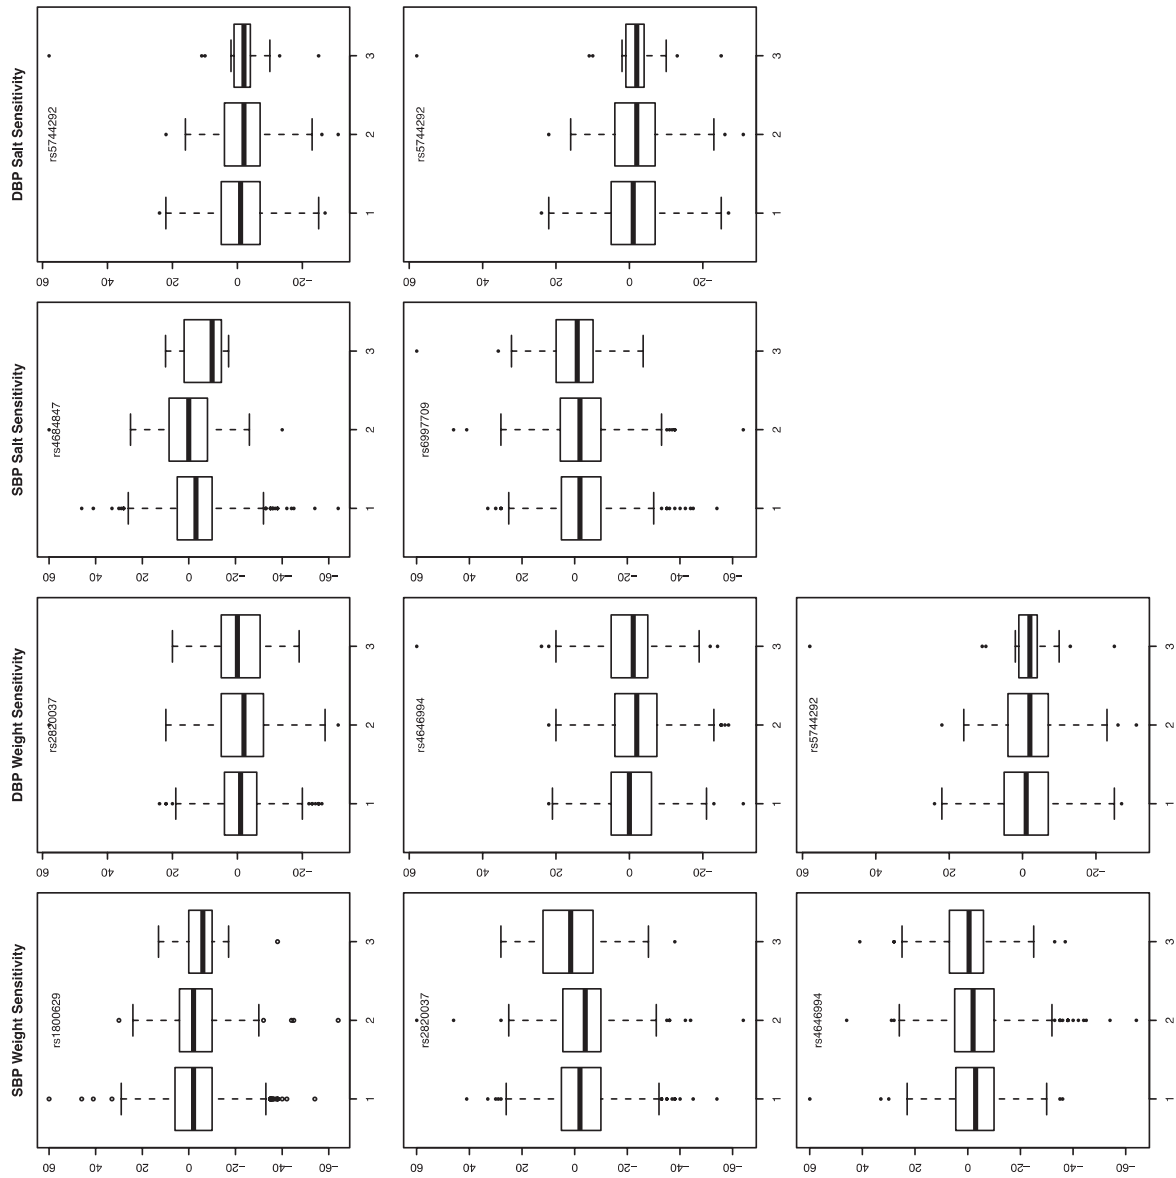

Figure S1.

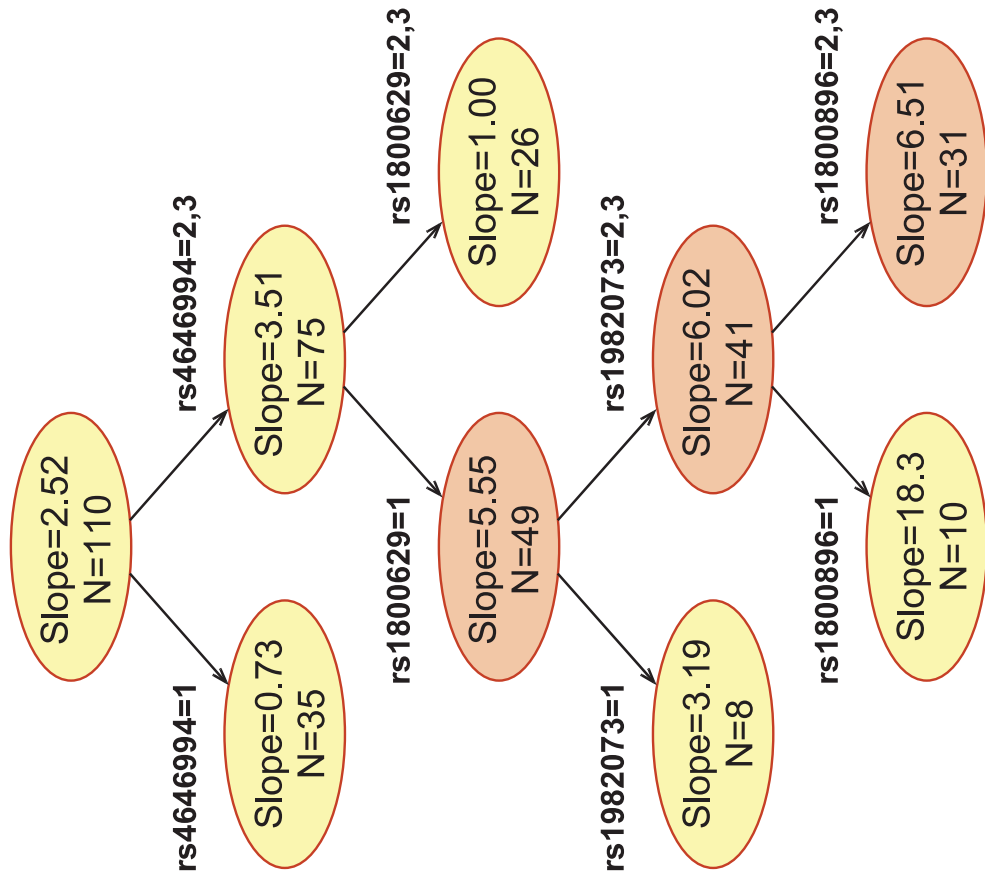

Figure S2.
